# Supplementary material for: Trace Elements in Stormflow, Ash, and Burned Soil following the 2009 Station Fire in Southern California
Source: PLoS One. 2016 May 4;11(5):e0153372. doi: 10.1371/journal.pone.0153372 (PMC4856391; doi:10.1371/journal.pone.0153372)
Supplement: S2 Table — (XLSX) [file pone.0153372.s002.xlsx]

## Sheet: S2 methods
S2 Table. Analytical methods used for the determination of constituents by the U.S. Geological Survey (USGS) laboratories.
[USGS National Water Quality Laboratory (NWQL) . Abbreviations: UV, ultraviolet; USEPA, U.S. Environmental Protection Agency; NRP, USGS National Research Program]
Analyte	Analytical Method	Laboratory	Citation(s)
Water-quality samples
Field parameters	Calibrated field meters and test kits	USGS field measurement	U.S. Geological Survey, variously dated.
Major and minor ions, and trace elements	Atomic absorption spectrometry, colorimetry, ion-exchange chromatography, inductively-coupled plasma atomic emission spectrometry, and mass spectrometry,	NWQL,	Fishman and Friedman, 1989; Fishman, 1993; Faires, 1993; McLain, 1993; Garbarino, 1999; American Public Health Association, 1998; Garbarino and others, 2006; Garbarino and Struzeski, 1998.
Mercury	cold vapor--atomic fluorescence spectrometry	NWQL,	Garbarino and Damrau, 2001.
Nutrients	Alkaline persulfate digestion, Kjedahl digestion	NWQL,	Fishman, 1993; Patton and Kryskalla, 2003; USEPA method 365.1.
Dissolved organic carbon	uv-promoted persulfate oxidation and infrared spectrometry	NWQL,	Brenton and Arnett, 1993.
Polyaromatic hydrocarbons	methylene chloride extraction and gas chromotography/mass spectrometry	NWQL,	Fishman, 1993
Suspended sediment	evaporation and filtration	USGS Sediement Lab, Santa Cruz, CA	Guy, 1969.
Ash and burned soil samples
Trace elements in soil and water	4-acid digestion, inductively coupled plasma-mass spectrometry	USGS Research Chemistry Laboratory, Denver, CO	Taggert, 2002.
Major anions in leachate	1;20 dilution, ion chromatography	USGS Research Chemistry Laboratory, Denver, CO	Hageman, 2007.
Trace elements in leachate	1:20 dilution, inductively coupled plasma-mass spectrometry	USGS Research Chemistry Laboratory, Denver, CO	Hageman, 2007.
U.S. Geological Survey. National field manual for the collection of water-quality data: [cited 20 August 2009; Techniques of Water-Resources Investigations, 9-A1 to A9. Available: http://water.usgs.gov/owq/FieldManual/
Fishman MJ, Friedman LC. Methods for determination of inorganic substances in water and fluvial sediments. Denver (CO): U.S. Geological Survey; 1989; Techniques of Water-Resources Investigations: 5- A1.
Brenton RW, Arnett TL. Methods of analysis by the U.S. Geological Survey National Water Quality Laboratory--Determination of dissolved organic carbon by uv-promoted persulfate oxidation and infrared spectrometry. Denver (CO): U.S. Geological Survey; 1993:Open-File Report 92-480..
Fishman M.J, editor. Methods of analysis by the U.S. Geological Survey National Water Quality Laboratory--Determination of inorganic and organic constituents in water and fluvial sediments. Denver (CO): U.S. Geological Survey; 1993.Open-File Report 93-125. 31. 33. American Public Health Association. 1998. Standard methods for the examination of water and wastewater, (20th ed). American Public Hea…
Garbarino JR, Struzeski TM. Methods of analysis by the U.S. Geological Survey National Water Quality Laboratory -- Determination of elements in whole-water digests using inductively coupled plasma- optical emission spectrometry and inductively coupled plasma-mass spectrometry. Denver (CO): U.S. Geological Survey; 1998. Open-File Report 98-165.
Garbarino JR. Methods of analysis by the U.S. Geological Survey National Water Quality Laboratory -- Determination of dissolved arsenic, boron, lithium, selenium, strontium, thallium, and vanadium using inductively coupled plasma-mass spectrometry. Denver (CO): U.S. Geological Survey; 1999. Open-File Report 99-093.
Garbarino JR, Damrau DL. Methods of analysis by the U.S. Geological Survey National Water Quality Laboratory---Determination of organic plus inorganic mercury in filtered and unfiltered natural water with cold vapor--atomic fluorescence spectrometry. Denver (CO): U.S. Geological Survey; 2001. Water-Resources Investigations Report 01-4132.
Garbarino JR, Kanagy LK, Cree ME. Determination of elements in natural-water, biota, sediment and soil samples using collision/reaction cell inductively coupled plasma-mass spectrometry. Reston (VA): U.S. Geological Survey; 2006. Techniques and Methods 5-B1.
Patton CJ, Kryskalla JR. Methods of Analysis by the U.S. Geological Survey National Water Quality Laboratory: Evaluation of Alkaline Persulfate Digestion as an Alternative to Kjeldahl Digestion for Determination of Total and Dissolved Nitrogen and Phosphorus in Water. Denver (CO): U.S. Geological Survey; 2003. Water-Resources Investigations Report 03-4174.
Guy HP. Laboratory theory and methods for sediment analysis. Washington DC: U.S. Geological Survey; 1969. Techniques of Water-Resources Investigations, 5- C1.
Taggart, J.E., Jr., ed., 2002, Analytical methods for chemical analysis of geologic and other materials: U.S. Geological Survey Open-File Report 02-0223, http://pubs.usgs.gov/of/2002/ofr-02-0223/
Hageman PL. U.S. Geological Survey field leach test for assessing water reactivity and leaching potential of mine wastes, soils, and other geologic and environmental materials. Reston (VA): U.S. Geological Survey; 2007. Techniques and Methods, 5- D3. Available: http://pubs.usgs.gov/tm/2007/05D03/.
